# Supplementary material
Source: PubMed Central journal article supplement (PMC2904532)
Supplement: ac1008749_si_001.pdf [file ac1008749_si_001.pdf]

# Acidification of Oxygen Scavenging System in Single Molecule Fluorescence Studies: In Situ Sensing with a Ratiometric Dual-Emission Probe

*Xinghua Shi, John Lim and Taekjip Ha\**

Howard Hughes Medical Institute, and Department of Physics and Institute for Genomic Biology,  
University of Illinois at Urbana-Champaign, Urbana, Illinois 61801

Supporting Information

Table of Contents

Figure S-1: Data sets from repeated experiments under the same condition as in Figure 3A.

Figure S-2: Acidification of the oxygen scavenging system with 0.25 mg/mL glucose oxidase.

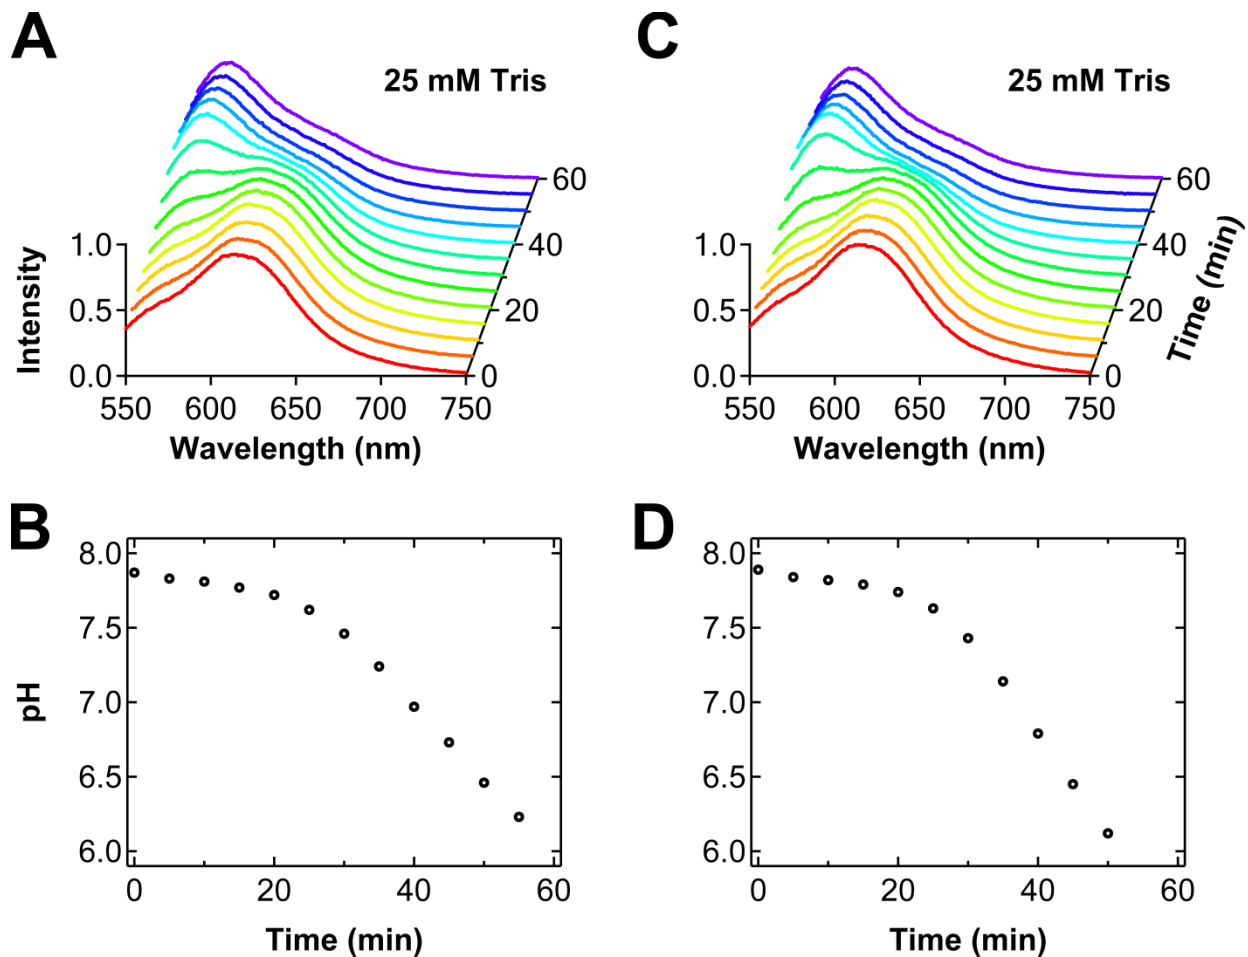

**Figure S-1.** Data sets from repeated experiments under the same condition as in Figure 3A. (A, C) Fluorescence emission spectra of SNARF-1 taken from time *zero* (red) to one hour (purple) at 5-min intervals in a pH 8.0 imaging buffer inside the flow chamber shown in Figure 1A (cf. Figure 3A). (B, D) The corresponding pH of the imaging buffer as a function of incubation time in the flow chamber (cf. Figure 3B).

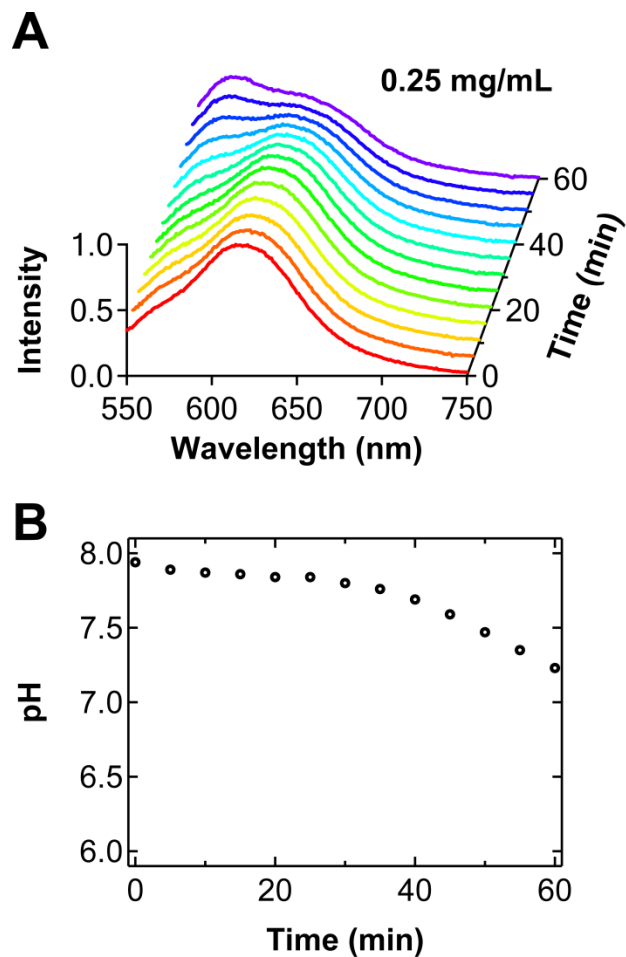

**Figure S-2.** (A) Fluorescence emission spectra of SNARF-1 taken from time *zero* (red) to one hour (purple) at 5-min intervals in a pH 8.0 imaging buffer inside the flow chamber shown in Figure 1A. This buffer contains the same components as the buffer in Figure 3A, except that 0.25 mg/mL glucose oxidase was used here instead of 1.0 mg/mL. (B) The corresponding pH of the imaging buffer as a function of incubation time in the flow chamber (cf. Figure 3B).
